# Supplementary material for: The additionality problem of ocean alkalinity enhancement
Source: Copernicus journal article supplement (doi:10.5194/bg-21-261-2024), 2024-01-16
Supplement: Supplementary file 1 [file bg-21-261-2024-supplement.pdf]

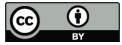

*Supplement of*

## **The additionality problem of ocean alkalinity enhancement**

**Lennart Thomas Bach**

*Correspondence to:* Lennart Thomas Bach ([lennart.bach@utas.edu.au](mailto:lennart.bach@utas.edu.au))

The copyright of individual parts of the supplement might differ from the article licence.

**Table S1.** Additional information on location and time of beach transects. The coordinates provided here show the exact location of the upper end of the swash zone. Transects extended 150-220 m offshore as shown in Fig. 3 in the main text.

| Location      | Latitude   | Longitude  | Sampling time | Low tide           | High tide          |
|---------------|------------|------------|---------------|--------------------|--------------------|
| Clifton South | -42.992299 | 147.524931 | 11:30-1:30    | 0.48 m at 11:02 am | 1.08 m at 17:58 pm |
| Goats         | -43.022267 | 147.500408 | 10:24-11:40   | 0.9 m at 13:26 pm  | 1.02 m at 9:40 am  |
| Clifton North | -42.987078 | 147.54194  | 10:16:-11:23  | 0.51 m at 9:37 am  | 1.15 m at 16:36 pm |
| Wedge         | -43.033122 | 147.475549 | 10:39-11:50   | 0.55 m at 6:56 am  | 1.19 m at 13:57 pm |

**Table S2.** Additional information on beach sand and alkalinity source minerals used for the three laboratory experiments. Sampling coordinates for olivine and steel slag are approximate as it was not recorded where exactly in the quarry/deposition site rocks were collected. The range provided for carbonate weights is based on the two most extreme assumptions that all carbonate in beach sand is  $MgCO_3$  (lower value) or  $CaCO_3$  (upper value).

| Mineral    | Latitude   | Longitude | PIC/POC (mol:mol) | Water content (%) | Carbonate weight (%) |
|------------|------------|-----------|-------------------|-------------------|----------------------|
| Beach 1    | -42.992872 | 147.52372 | 1.02              | 5.9               | 2.7 - 3.3            |
| Beach 2    | -42.991129 | 147.52686 | 2.97              | 13.5              | 11.9 - 14.2          |
| Beach 3    | -42.989084 | 147.53179 | 5.21              | 10.9              | 12.8 - 15.2          |
| Beach 4    | -42.988162 | 147.53538 | 16.25             | 4.3               | 24.4 - 28..9         |
| Beach 5    | -42.992724 | 147.52394 | 1.65              | 14.6              | 4.9. - 5.9           |
| Olivine    | -38.006    | 142.793   | -                 | -                 | -                    |
| Steel slag | -33.01     | 137.589   | -                 | -                 | -                    |

**Table S3.** Carbonate chemistry data to support understanding of Figs. 5 and 8. DIC additions,  $pH_T$  and  $\Omega_{Ara}$  values as they were determined at the beginning of experiment 2.

| Treatment | DIC addition ( $\mu\text{mol/kg}$ ) | $pH_T$ | $\Omega_{Ara}$ | $\Delta\text{Alkalinity}$ ( $\mu\text{mol/kg}$ ) | $\Delta\text{DIC}$ ( $\mu\text{mol/kg}$ ) | $\Delta\text{Alkalinity}/\Delta\text{DIC}$ (mol/mol) |
|-----------|-------------------------------------|--------|----------------|--------------------------------------------------|-------------------------------------------|------------------------------------------------------|
| sand-only | 0.0                                 | 7.92   | 1.87           | -5.0                                             | 29.5                                      | -0.2                                                 |
| sand-only | 43.6                                | 7.81   | 1.50           | 9.5                                              | 28.0                                      | 0.3                                                  |
| sand-only | 75.9                                | 7.72   | 1.24           | 18.4                                             | 28.9                                      | 0.6                                                  |
| sand-only | 114.4                               | 7.60   | 0.96           | 39.8                                             | 32.5                                      | 1.2                                                  |
| sand-only | 139.8                               | 7.52   | 0.81           | 59.2                                             | 34.8                                      | 1.7                                                  |
| sand-only | 164.9                               | 7.44   | 0.68           | 86.0                                             | 46.0                                      | 1.9                                                  |
| sand-only | 203.7                               | 7.32   | 0.52           | 240.3                                            | 185.2                                     | 1.3                                                  |
| sand-only | 242.8                               | 7.21   | 0.40           | 207.4                                            | 109.5                                     | 1.9                                                  |
| sand-only | 292.6                               | 7.08   | 0.31           | 288.5                                            | 137.5                                     | 2.1                                                  |
| sand-only | 364.2                               | 6.94   | 0.22           | 414.0                                            | 200.6                                     | 2.1                                                  |
| sand-only | 395.5                               | 6.89   | 0.20           | 457.2                                            | 214.5                                     | 2.1                                                  |
| sand-only | 436.6                               | 6.83   | 0.17           | 537.2                                            | 258.4                                     | 2.1                                                  |

|            |       |        |      |       |       |        |
|------------|-------|--------|------|-------|-------|--------|
| eq. NaOH   | 0.0   | 7.88   | 2.09 | 482.1 | 53.4  | 9.0    |
| eq. NaOH   | 25.5  | 7.82   | 1.87 | 487.8 | 17.5  | 27.9   |
| eq. NaOH   | 50.3  | 7.76   | 1.65 | 495.1 | 15.8  | 31.3   |
| eq. NaOH   | 82.0  | 7.68   | 1.40 | 500.3 | 10.8  | 46.2   |
| eq. NaOH   | 105.6 | 7.62   | 1.22 | 507.0 | 7.6   | 67.0   |
| eq. NaOH   | 126.3 | 7.57   | 1.08 | 511.0 | 6.2   | 82.2   |
| eq. NaOH   | 147.7 | 7.51   | 0.95 | 567.4 | 86.1  | 6.6    |
| eq. NaOH   | 188.0 | 7.40   | 0.75 | 549.3 | 12.7  | 43.3   |
| eq. NaOH   | 210.1 | 7.34   | 0.66 | 577.8 | 31.8  | 18.1   |
| eq. NaOH   | 234.2 | 7.28   | 0.58 | 614.8 | 50.9  | 12.1   |
| eq. NaOH   | 252.2 | 7.24   | 0.52 | 644.1 | 63.4  | 10.2   |
| eq. NaOH   | 252.3 | 7.24   | 0.52 | 626.2 | 47.3  | 13.2   |
| eq. NaOH   | 276.0 | 7.18   | 0.46 | 673.1 | 72.8  | 9.2    |
| eq. NaOH   | 325.0 | 7.08   | 0.37 | 746.9 | 101.7 | 7.3    |
| eq. NaOH   | 403.0 | 6.95   | 0.28 | 888.0 | 177.0 | 5.0    |
| eq. NaOH   | 460.9 | 6.87   | 0.23 | 972.8 | 212.4 | 4.6    |
| uneq. NaOH | 0.0   | 8.5776 | 7.07 | 343.7 | -7.8  | -44.0  |
| uneq. NaOH | 65.6  | 8.50   | 6.37 | 371.2 | 8.9   | 41.7   |
| uneq. NaOH | 131.2 | 8.43   | 5.67 | 391.7 | 15.4  | 25.4   |
| uneq. NaOH | 202.0 | 8.34   | 4.92 | 413.1 | 13.3  | 31.0   |
| uneq. NaOH | 285.6 | 8.23   | 4.05 | 438.6 | 15.9  | 27.5   |
| uneq. NaOH | 340.3 | 8.14   | 3.48 | 466.0 | 86.5  | 5.4    |
| uneq. NaOH | 397.8 | 8.05   | 2.90 | 480.3 | 91.0  | 5.3    |
| uneq. NaOH | 457.8 | 7.93   | 2.32 | 473.9 | 12.3  | 38.7   |
| Slag       | 0.0   | 7.92   | 1.87 | 521.2 | 11.7  | 44.7   |
| Slag       | 43.6  | 7.81   | 1.50 | 553.0 | 1.4   | 400.2  |
| Slag       | 75.9  | 7.72   | 1.24 | 648.6 | 1.7   | 373.0  |
| Slag       | 114.4 | 7.60   | 0.96 | 656.4 | 1.7   | 385.7  |
| Slag       | 139.8 | 7.52   | 0.81 | 533.5 | 1.7   | 308.4  |
| Slag       | 164.9 | 7.44   | 0.68 | 555.6 | 5.3   | 105.4  |
| Slag       | 203.7 | 7.32   | 0.52 | 773.6 | -6.2  | -125.4 |
| Slag       | 242.8 | 7.21   | 0.40 | 621.9 | 9.1   | 68.2   |
| Slag       | 292.6 | 7.08   | 0.31 | 607.8 | 4.9   | 123.0  |
| Slag       | 364.2 | 6.94   | 0.22 | 598.5 | 19.0  | 31.5   |
| Slag       | 395.5 | 6.89   | 0.20 | 925.7 | 6.1   | 152.6  |
| Slag       | 436.6 | 6.83   | 0.17 | 814.3 | 34.4  | 23.7   |
| Olivine    | 0.0   | 7.92   | 1.87 | 257.6 | 42.7  | 6.0    |
| Olivine    | 43.6  | 7.81   | 1.50 | 263.2 | 40.9  | 6.4    |
| Olivine    | 75.9  | 7.72   | 1.24 | 272.9 | 49.0  | 5.6    |
| Olivine    | 114.4 | 7.60   | 0.96 | 284.0 | 41.8  | 6.8    |
| Olivine    | 139.8 | 7.52   | 0.81 | 318.7 | 47.4  | 6.7    |
| Olivine    | 164.9 | 7.44   | 0.68 | 298.5 | 48.1  | 6.2    |

|         |       |      |      |       |      |     |
|---------|-------|------|------|-------|------|-----|
| Olivine | 203.7 | 7.32 | 0.52 | 304.8 | 51.3 | 5.9 |
| Olivine | 242.8 | 7.21 | 0.40 | 313.1 | 49.0 | 6.4 |
| Olivine | 292.6 | 7.08 | 0.31 | 356.9 | 50.7 | 7.0 |
| Olivine | 364.2 | 6.94 | 0.22 | 387.7 | 66.5 | 5.8 |
| Olivine | 395.5 | 6.89 | 0.20 | 409.7 | 69.9 | 5.9 |
| Olivine | 436.6 | 6.83 | 0.17 | 453.3 | 95.3 | 4.8 |

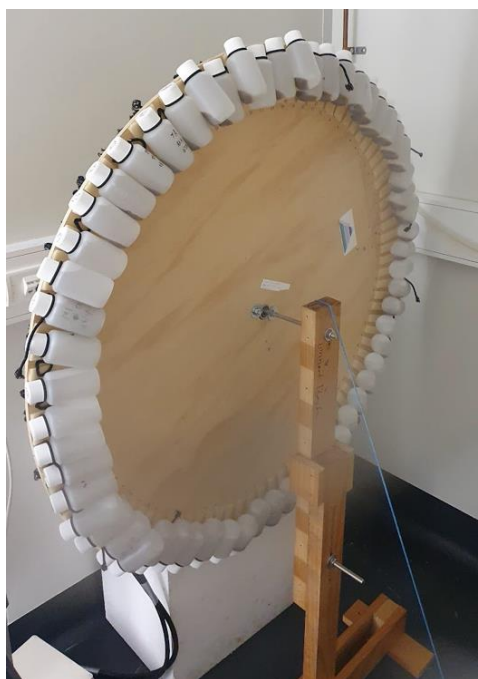

**Figure S1.** The plankton wheel used for experiments 1, 2, and 3. The picture shows the plankton wheel with incubation bottles mounted on it.

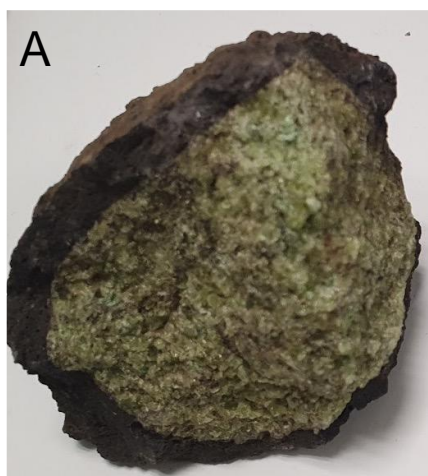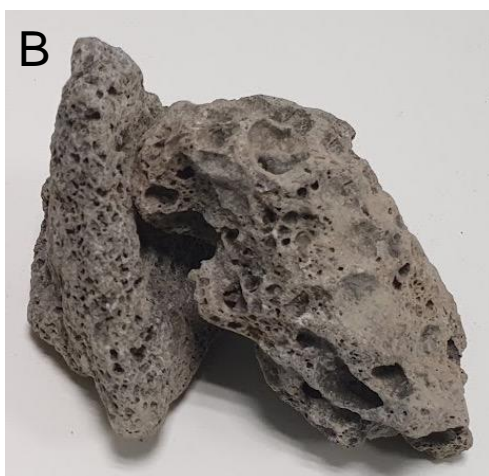

**Figure S2.** Raw material of olivine from Mortlake, Victoria, Australia (A) and steel slag from Whyalla, South Australia, Australia (B) before they were crushed to powder.

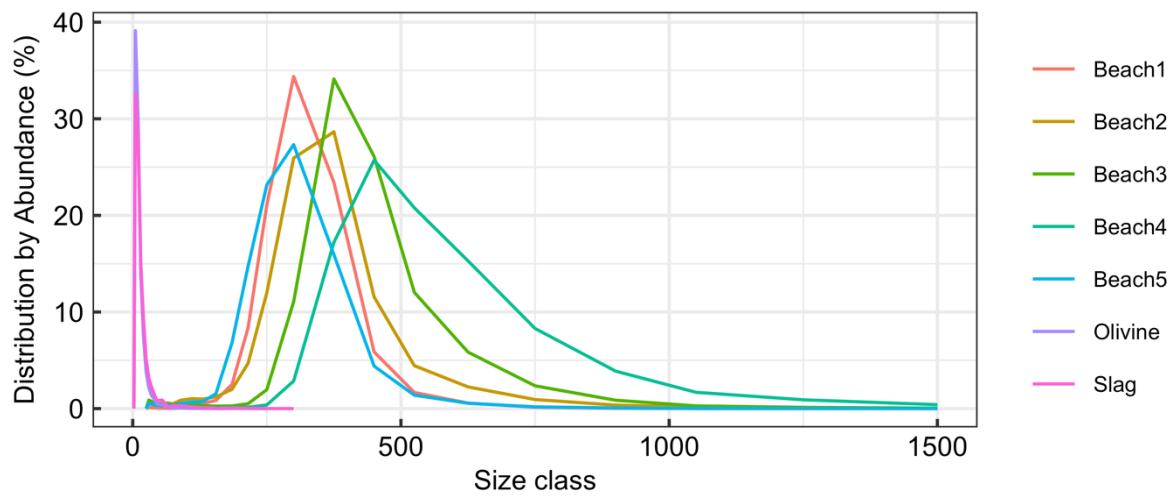

**Figure S3.** Size distribution of particles in beach sand and ground olivine/slag mineral used for incubations. Please note that distribution by abundance shows in which size class most of the particles occur but does not reflect the size class in which most of the mass is accumulated.
